# Supplementary material
Source: Springer Nature journal article supplement (https://www.springermedizin.de/resource/supplementary/12884_2013_1129_MOESM2_ESM.pdf/9458998)
Supplement: MOESM2 [file 9458998]

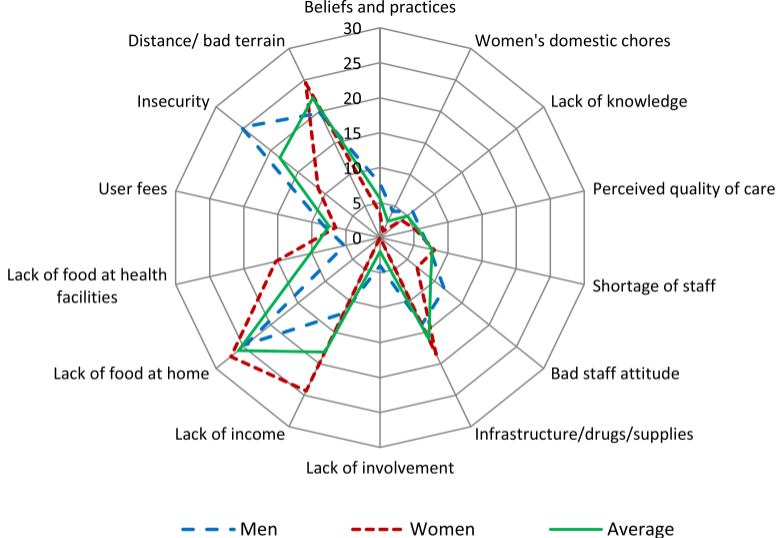

\*The role of traditional birth attendants and the role of men were not ranked by participants as they did not identify these factors as barriers. These two factors emerged as barriers through our data analysis.
